# Supplementary material for: Modification of channel structures by fluorination
Source: Royal Society of Chemistry journal article supplement (doi:10.1039/b311028a), 2004-01-01
Supplement: b311028a.doc [file b311028a.doc]

**
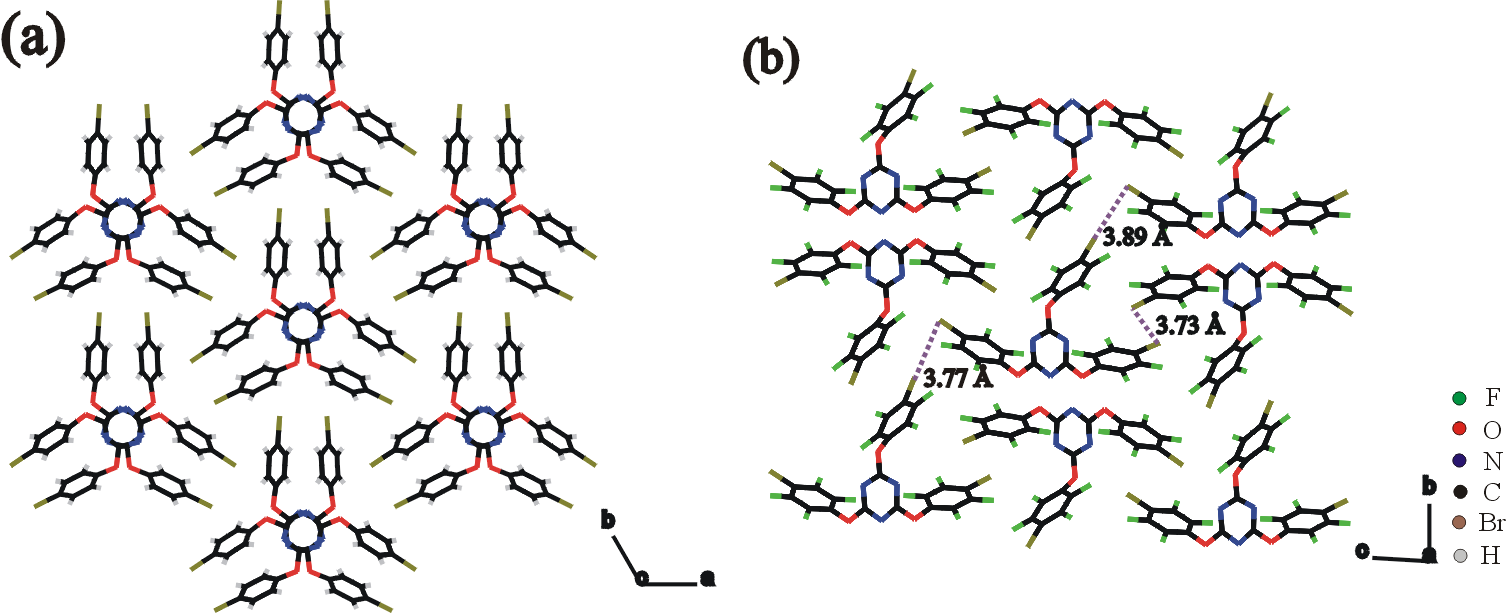
**

**Fig. 2** Crystal structures of (a) **1** and (b) **2** (Br···Br interactions are emphasized by broken lines).


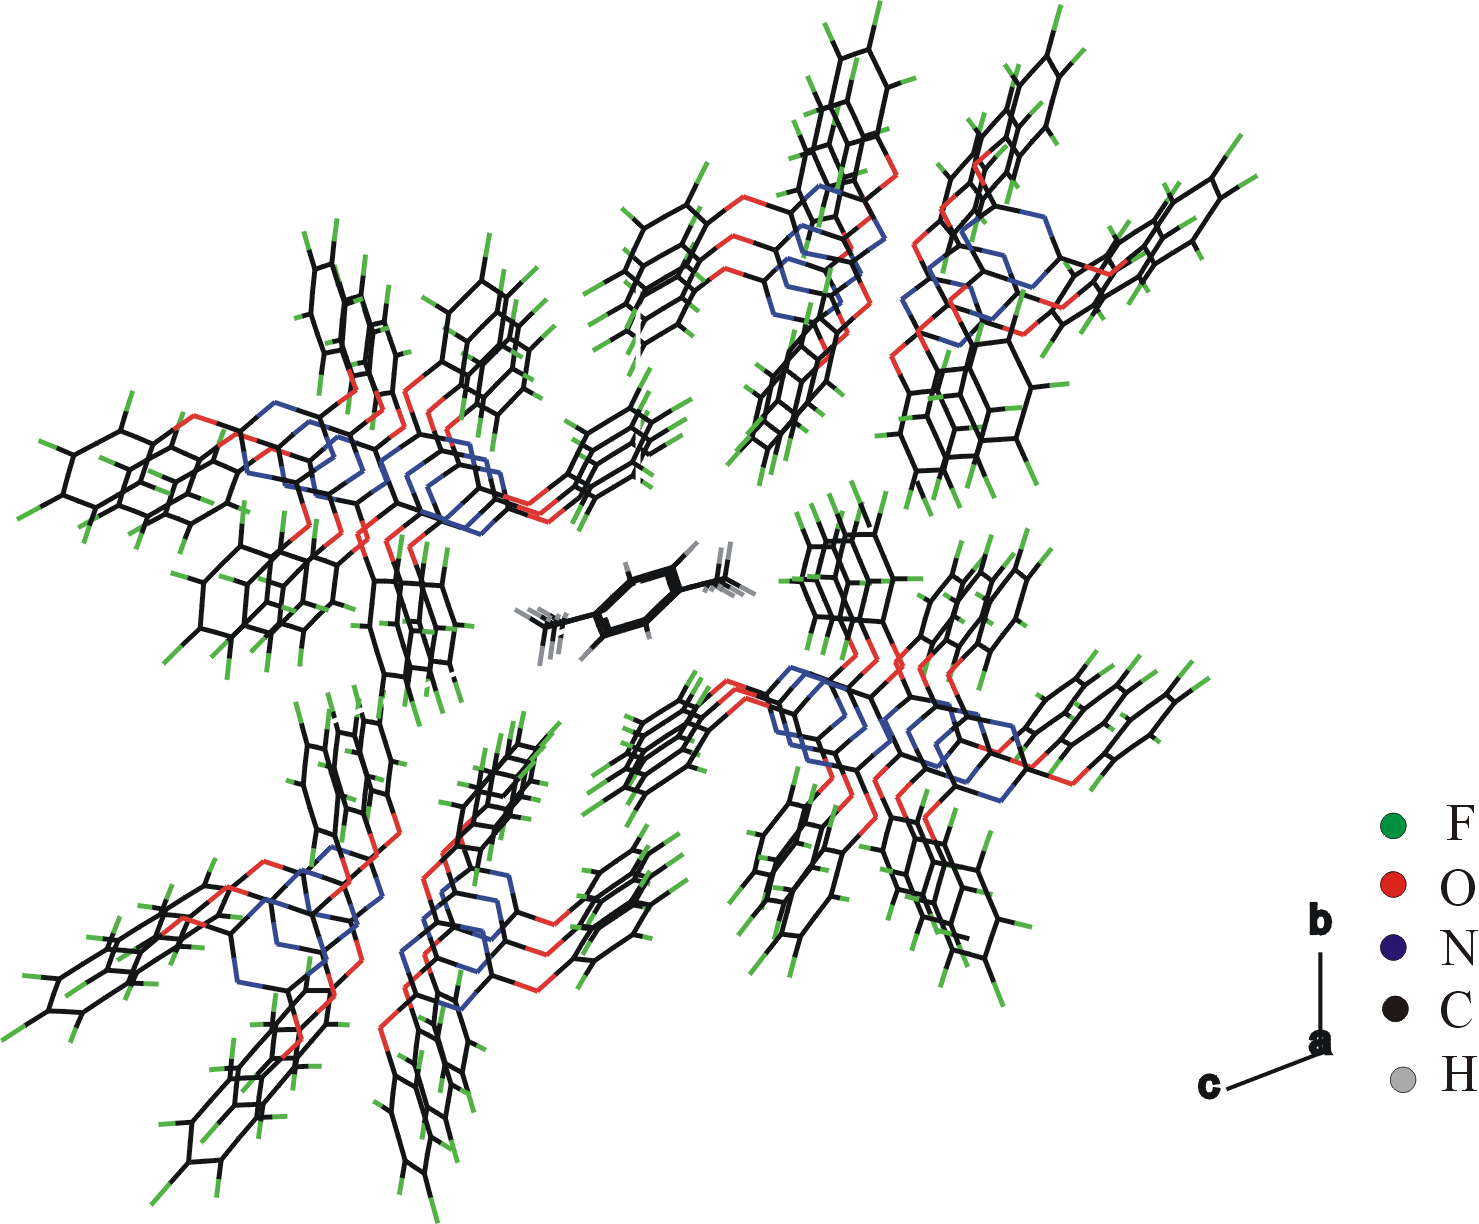


**Fig. 3** Crystal structure of **3**·(*p*-xylene)0.5.


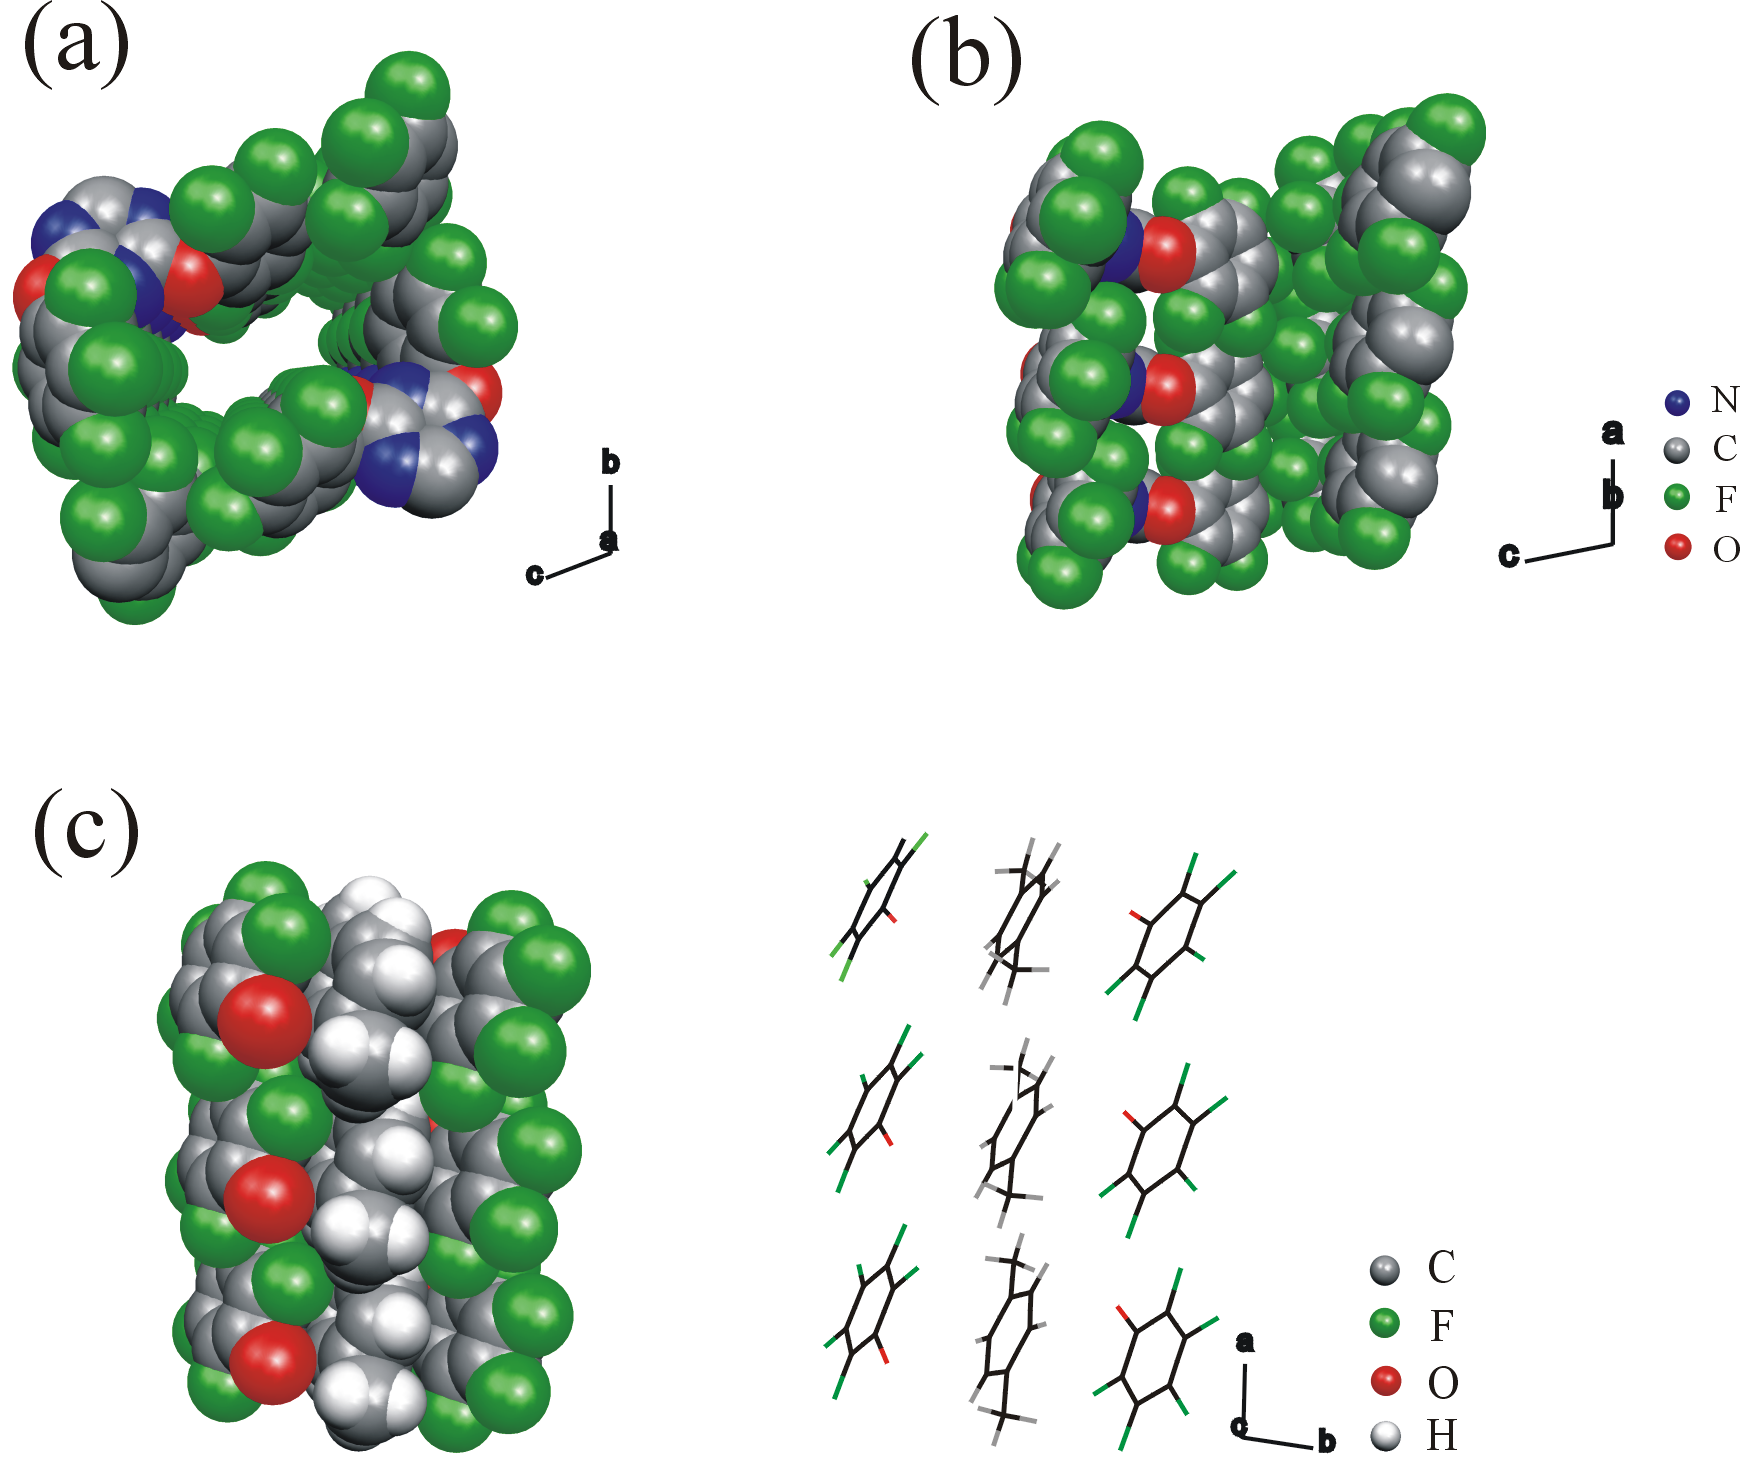


**Fig. 4** Channel wall of **3**·(*p*-xylene)0.5: (a) view along the channels (a-axis); (b) view onto the channel wall (b-axis); (c) host-guest interaction.

**
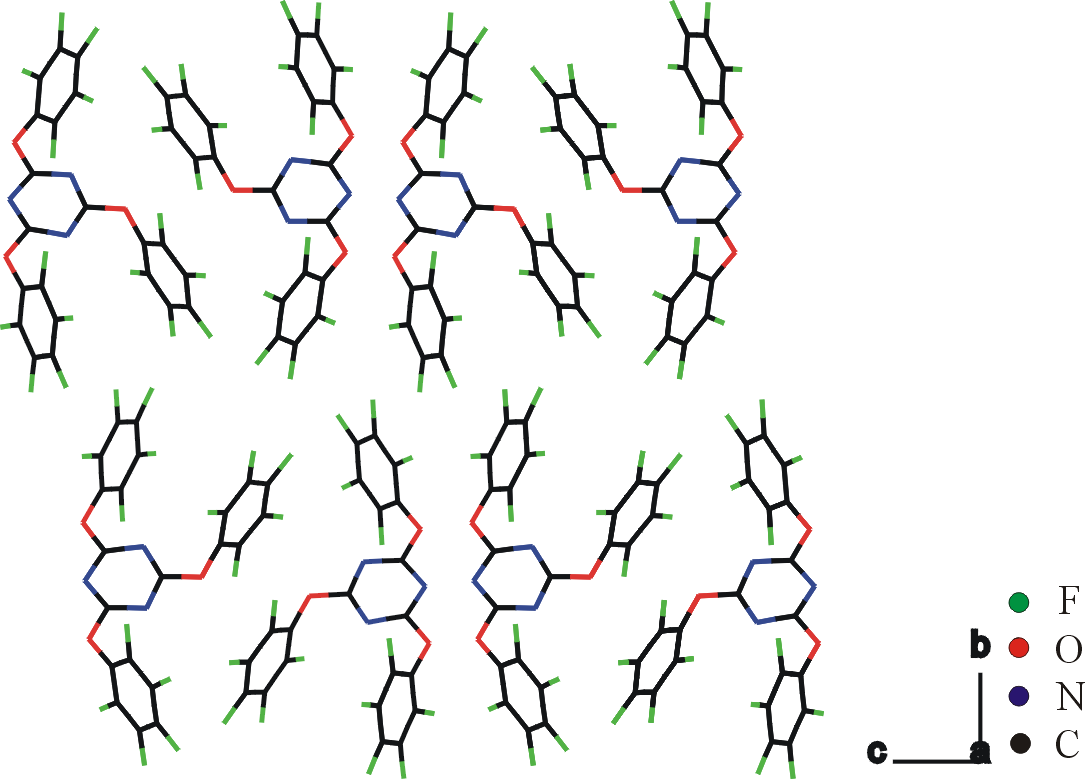
**

**Fig. 5** Crystal structure of **3**.
